# Supplementary material
Source: PubMed Central journal article supplement (PMC8503974)
Supplement: mmc1.pdf [file mmc1.pdf]

## Supplemental Appendix

eBox 1. Non-infectious and infectious uveitis ICD-10 codes used for inclusion and exclusion criteria

| Diagnosis                                                           | ICD-10 codes                          |
|---------------------------------------------------------------------|---------------------------------------|
| <b>Non-infectious Uveitis</b>                                       |                                       |
| Sarcoid iridocyclitis                                               | D86.83                                |
| <b>Anterior Uveitis:</b>                                            |                                       |
| Unspecified iridocyclitis                                           | H20.9                                 |
| Secondary noninfectious iridocyclitis                               | H20.04x                               |
| Chronic iridocyclitis                                               | H20.1x                                |
| Recurrent acute iridocyclitis                                       | H20.02x                               |
| Unspecified acute and subacute iridocyclitis                        | H20.00                                |
| Primary iridocyclitis                                               | H20.01x                               |
| <b>Intermediate Uveitis:</b>                                        |                                       |
| Posterior cyclitis                                                  | H30.2x                                |
| <b>Posterior Uveitis/Panuveitis:</b>                                |                                       |
| Retinal vasculitis                                                  | H35.06x                               |
| Vogt-Koyanagi-Harada (VKH)                                          | H20.82x, H30.81x                      |
| Panuveitis                                                          | H44.11x                               |
| Sympathetic uveitis                                                 | H44.13x                               |
| Focal chorioretinal inflammation                                    | H30.01x                               |
| Focal chorioretinal inflammation of posterior pole                  | H30.02x                               |
| Focal chorioretinal inflammation, macular/paramacular               | H30.03x                               |
| Focal chorioretinal inflammation, peripheral                        | H30.04x                               |
| Acute posterior multifocal placoid pigment epitheliopathy           | H30.14x                               |
| Other chorioretinal inflammations                                   | H30.89x                               |
| Unspecified chorioretinal inflammation                              | H30.9x                                |
| Choroidal dystrophy (central areolar) (generalized) (peripapillary) | H31.22                                |
| Other specified disorders of choroid                                | H31.8                                 |
| <b>Infectious Uveitis</b>                                           |                                       |
| Zoster ocular disease                                               | B02.3x                                |
| Herpesviral ocular disease                                          | B00.5x                                |
| Secondary syphilitic oculopathy                                     | A51.43                                |
| Gonococcal iridocyclitis                                            | A54.32                                |
| Histoplasmosis                                                      | B39.9, B39.4                          |
| Chorioretinal disorders in diseases classified elsewhere            | H32                                   |
| Toxoplasmosis                                                       | P37.1x, B58.x                         |
| Secondary infectious iridocyclitis                                  | H20.03x                               |
| Endophthalmitis                                                     | H44.00x, H44.19,<br>H44.12x           |
| Lens-induced iridocyclitis                                          | H20.2x                                |
| Disseminated chorioretinal inflammation                             | H30.10x, H30.11x,<br>H30.12x, H30.13x |
| Cytomegaloviral disease                                             | B25.9                                 |
| Injury of eye and orbit                                             | S05.x                                 |
| Tuberculous chorioretinitis                                         | A18.53                                |
| Tuberculosis                                                        | A15.x, A17.x,<br>A18.x, A19.x         |

|                                                                                                                                                                     |                                                                     |
|---------------------------------------------------------------------------------------------------------------------------------------------------------------------|---------------------------------------------------------------------|
| Syphilis<br>Lyme disease<br>Hypopyon<br>Fuchs' heterochromic cyclitis<br>Adverse effect of ophthalmological drugs and preparations<br>Adverse effect of rifampicins | A50.x-A52.x<br>A69.2x<br>H20.05x<br>H20.81x<br>T49.5X5A<br>T36.6X5A |
|---------------------------------------------------------------------------------------------------------------------------------------------------------------------|---------------------------------------------------------------------|

eBox 2. ICD-10 codes used to identify COVID-19 comorbidity risk factors for severe disease, hospitalization, or death

| <b>Condition</b>               | <b>ICD-10 codes</b>                                                                                                                                                                                                                                                                                                                                                                                                |
|--------------------------------|--------------------------------------------------------------------------------------------------------------------------------------------------------------------------------------------------------------------------------------------------------------------------------------------------------------------------------------------------------------------------------------------------------------------|
| <b>Cancer</b>                  | C00.x-C26.x, C30.x-C34.x, C37.x-C41.x, C43.x, C45.x-C58.x, C60.x-C76.x, C81.x-C85.x, C88.x, C90.x-C97.x (malignancy)<br><br>C77.x-C80.x (metastatic solid tumor)                                                                                                                                                                                                                                                   |
| <b>Chronic kidney diseases</b> | I12.xx, I13.xx, (hypertensive renal disease)<br>N03.2-N03.7, (chronic nephritic syndrome)<br>N05.2-N05.7, (unspecified nephrotic syndrome)<br>N18.xx, N19.x, (chronic kidney disease and failure)<br>N25.0, (impaired renal tubular function)<br>Z49.xx, (dialysis)<br>Z99.2 (dependence on renal dialysis)<br>Q61.x (cystic kidney disease),<br>E10.2, E11.2, E12.2, E13.2, E14.2 (DM with renal complications)   |
| <b>Chronic lung diseases</b>   | I27.8, I27.9, (pulmonary heart disease)<br>J40.x, J41.x, J42.x, (chronic bronchitis)<br>J43.x, J44.x, (COPD)<br>J47.x, (bronchiectasis)<br>J60.x, J61.x, J62.x, J63.x, J64.x, J65.x, J66.x, J67.x, (pneumoconiosis/pneumonitis)<br>J68.4, J70.1, J70.3 (chronic respiratory conditions due to external agents)<br>J84.x (interstitial pulmonary diseases)<br>E84.0 (cystic fibrosis with pulmonary manifestations) |
| <b>Asthma</b>                  | J45.x, J46.x                                                                                                                                                                                                                                                                                                                                                                                                       |
| <b>Cardiovascular diseases</b> | 109.81 (rheumatic heart failure)<br>I11.0, I13.0, I13.2, (hypertensive heart disease with heart failure)<br>I21.x, I22.x, I23.x, I25.x, (ischemic – excluding angina and other acute ischemic heart disease)<br>I42.x, I43.x, (cardiomyopathy)<br>I50.x (heart failure)                                                                                                                                            |
| <b>Hypertension</b>            | I10.x, I11.x, I12.x, I13.xx, I15.x                                                                                                                                                                                                                                                                                                                                                                                 |

|                                           |                                                                                                                                                                                                                                                                                                                                                                                                                                                                                                                                                                                                                                                                                                                                                                                                                                                                                                                                                                                                                                                                                                                                                                                                                                 |
|-------------------------------------------|---------------------------------------------------------------------------------------------------------------------------------------------------------------------------------------------------------------------------------------------------------------------------------------------------------------------------------------------------------------------------------------------------------------------------------------------------------------------------------------------------------------------------------------------------------------------------------------------------------------------------------------------------------------------------------------------------------------------------------------------------------------------------------------------------------------------------------------------------------------------------------------------------------------------------------------------------------------------------------------------------------------------------------------------------------------------------------------------------------------------------------------------------------------------------------------------------------------------------------|
| <b>Obesity (BMI≥30)</b>                   | E66.xx                                                                                                                                                                                                                                                                                                                                                                                                                                                                                                                                                                                                                                                                                                                                                                                                                                                                                                                                                                                                                                                                                                                                                                                                                          |
| <b>Diabetes mellitus</b>                  | E10.xx (DM1), E11.xx (DM2), E12.xx (malnutrition DM), E13.xx (other DM), E14.xx (unspecified DM), O24.xx (GDM)                                                                                                                                                                                                                                                                                                                                                                                                                                                                                                                                                                                                                                                                                                                                                                                                                                                                                                                                                                                                                                                                                                                  |
| <b>Solid organ transplantation</b>        | Z94.xx                                                                                                                                                                                                                                                                                                                                                                                                                                                                                                                                                                                                                                                                                                                                                                                                                                                                                                                                                                                                                                                                                                                                                                                                                          |
| <b>Cerebrovascular disease</b>            | G45.x, G46.x, (TIA/vascular syndromes)<br>H34.0x, H34.1x (transient or central retinal artery occlusion)<br>I60.x, I61.x, I62.x, I63.x, I64.x, I65.x, I66.x, I67.x, I68.x<br>I69.x (cerebrovascular diseases – stroke, hemorrhage, infarction, occlusion, stenosis)                                                                                                                                                                                                                                                                                                                                                                                                                                                                                                                                                                                                                                                                                                                                                                                                                                                                                                                                                             |
| <b>HIV/AIDS</b>                           | B20.x, B97.35, R75.x, Z21.x                                                                                                                                                                                                                                                                                                                                                                                                                                                                                                                                                                                                                                                                                                                                                                                                                                                                                                                                                                                                                                                                                                                                                                                                     |
| <b>Autoimmune disease</b>                 | M02.9, (Reactive arthritis)<br>M05.x, M06.x, (rheumatoid arthritis)<br>M07.x, (psoriatic and enteropathic arthritis)<br>M08.xx, M09.x, (juvenile arthritis)<br>M10.x, (gout)<br>M30.x, (Polyarteritis nodosa)<br>M31.3, (Wegener's)<br>M31.5, M31.6, M35.3, (polymyalgia rheumatica)<br>M32.1, M32.8, M32.9, L93.x (SLE)<br>M33.x, (dermatopolymyositis)<br>M34.x, (systemic sclerosis)<br>M35.0, (Sjogren's)<br>M35.2, (Behcet's)<br>M45.x, (ankylosing spondylitis)<br>M47.819, (Undifferentiated spondyloarthropathy)<br>M94.1 (Relapsing polychondritis)<br>G35.x, (multiple sclerosis)<br>G61.0, (Guillain-Barré)<br>G70.0, (myasthenia gravis)<br>D59.1, (autoimmune hemolytic anemia)<br>D86.x, (sarcoidosis)<br>K50.x, K51.x, (Crohn's and ulcerative colitis)<br>K75.4, (autoimmune hepatitis)<br>L80.x, (vitiligo)<br>L63.x, (alopecia areata)<br>L40.x, (psoriasis vulgaris)<br>L10.x, L12.x, (pemphigus and pemphigoid)<br>K90.0, (Celiac disease)<br>E06.3, (autoimmune thyroiditis)<br>D69.3, (Immune thrombocytopenic purpura)<br>E27.1, (primary adrenocortical insufficiency)<br>E31.0, (autoimmune polyglandular failure)<br>K74.3 (primary biliary cirrhosis)<br>N05.8, N05.9 (Tubulointerstitial nephritis) |
| <b>Liver disease (moderate or severe)</b> | I85.0, I85.9, I86.4, I98.2, I98.3, (Esophageal or gastric varices – signs of severe liver disease)                                                                                                                                                                                                                                                                                                                                                                                                                                                                                                                                                                                                                                                                                                                                                                                                                                                                                                                                                                                                                                                                                                                              |

|                                                                                                 |                                                                                                                                                                                                                                                                                                                                                                                                                                                                                                                                                                                                                                                                                                                                                                                                                             |
|-------------------------------------------------------------------------------------------------|-----------------------------------------------------------------------------------------------------------------------------------------------------------------------------------------------------------------------------------------------------------------------------------------------------------------------------------------------------------------------------------------------------------------------------------------------------------------------------------------------------------------------------------------------------------------------------------------------------------------------------------------------------------------------------------------------------------------------------------------------------------------------------------------------------------------------------|
|                                                                                                 | <p>K70.4, K71.1, K72.1, K72.9, (hepatic failure)<br/> K76.5, (hepatic veno-occlusive disease)<br/> K76.6, (portal hypertension)<br/> K76.7 (hepatorenal syndrome)</p>                                                                                                                                                                                                                                                                                                                                                                                                                                                                                                                                                                                                                                                       |
| <b>Neurologic conditions</b>                                                                    | <p>F00.xx, F01.xx, F02.xx, F03.xx, F04.x, G13.8, F05.x, F06.1, F06.8, G30.x, G31.x, G94.x, R41.81, R54.x, (Alzheimer's/dementia)</p> <p>G20.x, (Parkinson's)<br/> G10.x, (Huntington's)<br/> G11.xx, (hereditary ataxia)<br/> G12.2x, (motor neuron disease)<br/> G35.x, (multiple sclerosis)<br/> G61.0, (Guillain-Barré)<br/> G70.0, (myasthenia gravis)<br/> G80.x, (cerebral palsy)<br/> G81.x, G82.x, (hemiplegia, paraplegia, or quadriplegia)</p>                                                                                                                                                                                                                                                                                                                                                                    |
| <b>Hemoglobin disorders (sickle cell disease or thalassemia)</b>                                | <p>D56.x, (thalassemia)<br/> D57.xx (sickle cell disorders)</p>                                                                                                                                                                                                                                                                                                                                                                                                                                                                                                                                                                                                                                                                                                                                                             |
| <b>Pregnancy</b><br>Check for any pregnancy or delivery related codes during COVID risk period. | <p>Oxx.xxx, Z33.x, Z34.xx, Z35.x, Z37.x, Z38.xx, Z39.0, Z3A.xx</p>                                                                                                                                                                                                                                                                                                                                                                                                                                                                                                                                                                                                                                                                                                                                                          |
| <b>Smoking</b><br>Check for codes one year prior to index through risk period                   | <p><u>ICD-10 codes</u><br/> Z71.6, (tobacco abuse counseling)<br/> Z72.0, (tobacco use)<br/> F17.xxx, (Nicotine dependence)<br/> O99.33x, (smoking tobacco use complicating pregnancy)<br/> T65.2xx (toxic effect of tobacco product)<br/> Z87.891 (personal history of nicotine dependence)</p> <p><u>HCPCS/CPT codes:</u><br/> 99406, 99407, (smoking and tobacco cessation counseling visit)<br/> S9453, S9075, (smoking cessation classes)<br/> G9276, G8455, G9902, G9906, G9908, G9909, 1034F, 1035F, 4000F, 4001F, 4004F (current tobacco use)<br/> G9275, G8457, G9903, 1036F (documentation of <b>NO</b> current tobacco use)</p> <p><u>Medications:</u><br/> varenicline tartrate (Chantix)<br/> bupropion hydrochloride (Zyban only)<br/> nicotine (any drug containing nicotine including patch, gum, etc.)</p> |

Unless otherwise noted, looking for comorbidity codes in one year prior to index date.

eBox 3. Immunosuppressive medication categories

| Immunosuppressive medication category                                                                                   | Medication generic names                                                                                                                                                                                                                                                                                                                                                                                                                                                                                                                                                                                                                                                                                                                                               |
|-------------------------------------------------------------------------------------------------------------------------|------------------------------------------------------------------------------------------------------------------------------------------------------------------------------------------------------------------------------------------------------------------------------------------------------------------------------------------------------------------------------------------------------------------------------------------------------------------------------------------------------------------------------------------------------------------------------------------------------------------------------------------------------------------------------------------------------------------------------------------------------------------------|
| <p><b>Systemic corticosteroids</b></p> <p>Routes: oral, intravenous</p>                                                 | <p>Prednisone<br/>                     Prednisolone<br/>                     Methylprednisolone<br/>                     Dexamethasone<br/>                     Triamcinolone<br/>                     Hydrocortisone<br/>                     Budesonide<br/>                     Cortisone acetate<br/>                     Betamethasone</p>                                                                                                                                                                                                                                                                                                                                                                                                                        |
| <p><b>Disease modifying anti-rheumatic drugs (DMARDs)</b></p> <p>Routes: oral, intravenous, injection, subcutaneous</p> | <p>Methotrexate<br/>                     Azathioprine<br/>                     Mycophenolate mofetil<br/>                     Mycophenolic acid<br/>                     Cyclosporine<br/>                     Leflunomide<br/>                     Tacrolimus</p>                                                                                                                                                                                                                                                                                                                                                                                                                                                                                                     |
| <p><b>Tumor necrosis factor alpha (TNF-<math>\alpha</math>) inhibitors</b></p> <p>Routes: intravenous, subcutaneous</p> | <p>Etanercept<br/>                     Infliximab<br/>                     Afelimomab<br/>                     Adalimumab<br/>                     Certolizumab pegol<br/>                     Golimumab</p>                                                                                                                                                                                                                                                                                                                                                                                                                                                                                                                                                           |
| <p><b>Interleukin-6 (IL-6) inhibitors</b></p> <p>Routes: intravenous, subcutaneous</p>                                  | <p>Sarilumab<br/>                     Tocilizumab<br/>                     Siltuximab<br/>                     Satralizumab</p>                                                                                                                                                                                                                                                                                                                                                                                                                                                                                                                                                                                                                                        |
| <p><b>Other biologic immunosuppressive therapies</b></p> <p>Routes: intravenous, intramuscular, subcutaneous</p>        | <p>Rituximab<br/>                     Abatacept<br/>                     Ocrelizumab<br/>                     Ixekizumab<br/>                     Secukinumab<br/>                     Brodalumab<br/>                     Ustekinumab<br/>                     Guselkumab<br/>                     Risankizumab<br/>                     Tildrakizumab<br/>                     Dupilumab<br/>                     Omalizumab<br/>                     Belimumab<br/>                     Alefacept<br/>                     Efalizumab<br/>                     Natalizumab<br/>                     Eculizumab<br/>                     Belimumab<br/>                     Vedolizumab<br/>                     Alemtuzumab<br/>                     Emapalumab</p> |

|                                                                                                            |                                                                                                                                                                                                                                                                                                                                                                         |
|------------------------------------------------------------------------------------------------------------|-------------------------------------------------------------------------------------------------------------------------------------------------------------------------------------------------------------------------------------------------------------------------------------------------------------------------------------------------------------------------|
|                                                                                                            | <p>Ravulizumab<br/> Inebilizumab<br/> Anakinra<br/> Rilonacept<br/> Canakinumab<br/> Daclizumab<br/> Basiliximab<br/> Interferon beta-1a<br/> Interferon beta-1b<br/> Peginterferon beta-1a<br/> Ofatumumab</p>                                                                                                                                                         |
| <p><b>Other non-biologic immunosuppressive drugs</b><br/><br/> Routes: oral, intravenous, subcutaneous</p> | <p>Sulfasalazine<br/> Apremilast<br/> Tofacitinib<br/> Baricitinib<br/> Ruxolitinib<br/> Immunoglobulin<br/> Fingolimod<br/> Teriflunomide<br/> Ozanimod<br/> Cladribine<br/> Siponimod<br/> Upadacitinib<br/> Filgotinib<br/> Dimethyl fumarate<br/> Cyclophosphamide<br/> Glatiramer acetate<br/> Mercaptopurine<br/> Diroximel fumarate<br/> Monomethyl fumarate</p> |
