# Supplementary material
Source: PubMed Central journal article supplement (PMC8503974)
Supplement: mmc2.pdf [file mmc2.pdf]

Supplemental Table 5. Unadjusted analyses of associations between demographic and clinical characteristics and COVID-19 hospitalization

| Variable                      | No COVID-19 Hospitalization<br>N = 5,769,906 | COVID-19 Hospitalization<br>N = 36,321 | Unadjusted analysis   |         |
|-------------------------------|----------------------------------------------|----------------------------------------|-----------------------|---------|
|                               | N (%) or Mean (SD)                           | N (%) or Mean (SD)                     | Hazard Ratio (95% CI) | p-value |
| <b>Non-infectious uveitis</b> | 29,506 (0.5)                                 | 363 (1.0)                              | 1.91 (1.72, 2.12)     | <0.001  |
| <b>Age (years)</b>            | 50.1 (23.5)                                  | 72.2 (13.7)                            | 1.060 (1.059, 1.061)  | <0.001  |
| <b>Gender</b>                 |                                              |                                        | Reference             |         |
| Female                        | 2,968,625 (51.5)                             | 18,153 (50.0)                          |                       |         |
| Male                          | 2,798,250 (48.5)                             | 18,156 (50.0)                          | 1.07 (1.05, 1.09)     | <0.001  |
| Unknown                       | 3,031 (0.05)                                 | 12 (0.03)                              | 0.60 (0.34, 1.06)     | 0.08    |
| <b>Race/ethnicity</b>         |                                              |                                        | Reference             |         |
| White                         | 3,716,891 (64.4)                             | 20,805 (57.3)                          |                       |         |
| Asian                         | 299,098 (5.2)                                | 963 (2.7)                              | 0.60 (0.56, 0.64)     | <0.001  |
| Black                         | 580,077 (10.1)                               | 7,220 (19.9)                           | 2.24 (2.18, 2.30)     | <0.001  |
| Hispanic                      | 670,909 (11.6)                               | 5,337 (14.7)                           | 1.47 (1.42, 1.51)     | <0.001  |
| Other/Unknown                 | 502,931 (8.7)                                | 1,996 (5.5)                            | 0.69 (0.66, 0.72)     | <0.001  |
| <b>Region</b>                 |                                              |                                        | Reference             |         |
| South                         | 2,485,688 (43.1)                             | 17,818 (49.1)                          |                       |         |
| Midwest                       | 1,525,091 (26.4)                             | 10,141 (27.9)                          | 0.92 (0.90, 0.94)     | <0.001  |
| Northeast                     | 634,747 (11.0)                               | 5,629 (15.5)                           | 1.23 (1.20, 1.27)     | <0.001  |
| West                          | 945,467 (16.4)                               | 2,686 (7.4)                            | 0.41 (0.40, 0.43)     | <0.001  |
| Other/Unknown                 | 178,913 (3.1)                                | 47 (0.1)                               | 0.04 (0.03, 0.05)     | <0.001  |
| <b>Homeownership</b>          |                                              |                                        | Reference             |         |
| Probable homeowner            | 3,956,854 (68.6)                             | 24,507 (67.5)                          |                       |         |
| Probable renter               | 440,102 (7.6)                                | 2,766 (7.6)                            | 1.06 (1.02, 1.10)     | 0.006   |
| Unknown                       | 1,372,950 (23.8)                             | 9,048 (24.9)                           | 1.10 (1.07, 1.13)     | <0.001  |
| <b>Smoking status</b>         |                                              |                                        | Reference             |         |
| Never smoker                  | 845,134 (14.7)                               | 5,929 (16.3)                           |                       |         |
| Current/former smoker         | 925,365 (16.0)                               | 13,112 (36.1)                          | 2.05 (1.98, 2.11)     | <0.001  |
| Unknown                       | 3,999,407 (69.3)                             | 17,280 (47.6)                          | 0.64 (0.62, 0.66)     | <0.001  |
| <b>Asthma</b>                 | 32,4058 (5.6)                                | 3,562 (9.8)                            | 1.81 (1.75, 1.87)     | <0.001  |
| <b>Autoimmune disease</b>     | 419,864 (7.3)                                | 5,890 (16.2)                           | 2.42 (2.35, 2.48)     | <0.001  |
| <b>Cancer</b>                 | 309,673 (5.4)                                | 4,644 (12.8)                           | 2.55 (2.47, 2.63)     | <0.001  |
| <b>Cardiovascular disease</b> | 596,768 (10.3)                               | 14,237 (39.2)                          | 5.49 (5.37, 5.60)     | <0.001  |
| <b>Cerebrovascular</b>        | 268,878 (4.7)                                | 6,328 (17.4)                           | 4.27 (4.16, 4.39)     | <0.001  |
| <b>Chronic kidney disease</b> | 433,796 (7.5)                                | 11,615 (32.0)                          | 5.66 (5.53, 5.78)     | <0.001  |
| <b>Chronic lung disease</b>   | 432,819 (7.5)                                | 9,253 (25.5)                           | 4.18 (4.08, 4.28)     | <0.001  |
| <b>Diabetes</b>               | 833,567 (14.5)                               | 16,993 (46.8)                          | 5.06 (4.95, 5.16)     | <0.001  |
| <b>Hemoglobin disorder</b>    | 8,477 (0.2)                                  | 120 (0.3)                              | 2.22 (1.85, 2.65)     | <0.001  |
| <b>HIV/AIDS</b>               | 11,862 (0.2)                                 | 161 (0.4)                              | 2.19 (1.87, 2.55)     | <0.001  |
| <b>Hypertension</b>           | 1,988,065 (34.5)                             | 28,856 (79.5)                          | 7.04 (6.87, 7.22)     | <0.001  |
| <b>Liver disease</b>          | 10,861 (0.2)                                 | 271 (0.8)                              | 4.30 (3.81, 4.84)     | <0.001  |
| <b>Neurologic disease</b>     | 224,551 (3.9)                                | 7,622 (21.0)                           | 6.81 (6.64, 6.99)     | <0.001  |
| <b>Obesity</b>                | 620,546 (10.8)                               | 8,334 (23.0)                           | 2.42 (2.37, 2.48)     | <0.001  |

|                                      |                |              |                   |        |
|--------------------------------------|----------------|--------------|-------------------|--------|
| <b>Solid organ transplant</b>        | 15,719 (0.3)   | 389 (1.1)    | 3.90 (3.53, 4.31) | <0.001 |
| <b>Pregnancy</b>                     | 61,956 (1.1)   | 353 (1.0)    | 0.90 (0.81, 1.00) | 0.06   |
| <b>Systemic corticosteroids</b>      | 634,020 (11.0) | 8,730 (24.0) | 2.41 (2.35, 2.46) | <0.001 |
| <b>DMARDs</b>                        | 51,817 (0.9)   | 893 (2.5)    | 2.63 (2.47, 2.82) | <0.001 |
| <b>TNF-alpha inhibitors</b>          | 16,585 (0.3)   | 112 (0.3)    | 1.05 (0.87, 1.26) | 0.64   |
| <b>IL-6 inhibitors</b>               | >749 (>0.01)   | <11 (<0.03)  | 1.60 (0.80, 3.20) | 0.18   |
| <b>Other biologics</b>               | 13,658 (0.2)   | 91 (0.3)     | 1.02 (0.83, 1.26) | 0.84   |
| <b>Other immunosuppressive drugs</b> | 20,532 (0.4)   | 248 (0.7)    | 1.84 (1.62, 2.08) | <0.001 |

P-values calculated from Cox proportional hazards models. Reference groups for comorbidities and medications are the group of patients without the given disease or without a prescription for the given medication. SD=standard deviation; CI=confidence interval; HIV=human immunodeficiency virus; AIDS=acquired immunodeficiency syndrome; DMARDs=disease-modifying anti-rheumatic drugs; TNF-alpha=tumor necrosis factor alpha; IL-6=interleukin 6.
