# Supplementary material
Source: PubMed Central journal article supplement (PMC8503974)
Supplement: mmc3.pdf [file mmc3.pdf]

Supplemental Table 6. Fully adjusted and reduced (no immunosuppressives) model results showing associations of demographic and clinical characteristics with COVID-19 hospitalization

| Variable                                      | Fully Adjusted Model<br>Immunosuppressives included |         | Reduced Model<br>Immunosuppressives removed |         |
|-----------------------------------------------|-----------------------------------------------------|---------|---------------------------------------------|---------|
|                                               | Adjusted HR (95% CI)                                | p-value | Adjusted HR (95% CI)                        | p-value |
| Non-infectious uveitis                        | 0.98 (0.88, 1.09)                                   | 0.67    | 0.99 (0.89, 1.10)                           | 0.83    |
| Age (years)                                   | 1.039 (1.038, 1.040)                                | <0.001  | 1.039 (1.038, 1.040)                        | <0.001  |
| Male vs. Female                               | 1.28 (1.26, 1.31)                                   | <0.001  | 1.27 (1.24, 1.29)                           | <0.001  |
| Unknown vs. Female                            | 0.34 (0.19, 0.60)                                   | <0.001  | 0.34 (0.19, 0.60)                           | <0.001  |
| Asian vs. White                               | 1.03 (0.96, 1.10)                                   | 0.40    | 1.01 (0.95, 1.08)                           | 0.75    |
| Black vs. White                               | 1.68 (1.63, 1.73)                                   | <0.001  | 1.67 (1.62, 1.71)                           | <0.001  |
| Hispanic vs. White                            | 1.72 (1.67, 1.77)                                   | <0.001  | 1.70 (1.65, 1.75)                           | <0.001  |
| Other/Unknown vs. White                       | 0.99 (0.95, 1.04)                                   | 0.68    | 0.99 (0.94, 1.04)                           | 0.64    |
| Midwest vs. South                             | 1.26 (1.23, 1.29)                                   | <0.001  | 1.24 (1.21, 1.28)                           | <0.001  |
| Northeast vs. South                           | 1.23 (1.19, 1.27)                                   | <0.001  | 1.20 (1.16, 1.24)                           | <0.001  |
| West vs. South                                | 0.75 (0.72, 0.78)                                   | <0.001  | 0.73 (0.70, 0.76)                           | <0.001  |
| Other/Unknown vs. South                       | 0.13 (0.09, 0.17)                                   | <0.001  | 0.12 (0.09, 0.16)                           | <0.001  |
| Probable renter vs.<br>Probable homeowner     | 1.35 (1.29, 1.40)                                   | <0.001  | 1.35 (1.29, 1.40)                           | <0.001  |
| Unknown vs. Probable<br>homeowner             | 1.48 (1.45, 1.52)                                   | <0.001  | 1.48 (1.44, 1.52)                           | <0.001  |
| Current/former smoker vs.<br>Never smoker     | 1.30 (1.26, 1.34)                                   | <0.001  | 1.32 (1.28, 1.37)                           | <0.001  |
| Unknown smoking status<br>vs.<br>Never smoker | 0.99 (0.96, 1.02)                                   | 0.57    | 0.98 (0.95, 1.01)                           | 0.18    |
| Asthma                                        | 1.16 (1.12, 1.20)                                   | <0.001  | 1.23 (1.18, 1.27)                           | <0.001  |
| Autoimmune disease                            | 1.08 (1.05, 1.11)                                   | <0.001  | 1.16 (1.13, 1.20)                           | <0.001  |
| Cancer                                        | 1.03 (0.99, 1.06)                                   | 0.13    | 1.04 (1.01, 1.07)                           | 0.02    |
| Cardiovascular disease                        | 1.35 (1.31, 1.38)                                   | <0.001  | 1.36 (1.32, 1.39)                           | <0.001  |
| Cerebrovascular                               | 1.07 (1.04, 1.10)                                   | <0.001  | 1.07 (1.04, 1.10)                           | <0.001  |
| Chronic kidney disease                        | 1.39 (1.36, 1.43)                                   | <0.001  | 1.39 (1.36, 1.42)                           | <0.001  |
| Chronic lung disease                          | 1.27 (1.24, 1.30)                                   | <0.001  | 1.34 (1.31, 1.38)                           | <0.001  |
| Diabetes                                      | 1.68 (1.64, 1.72)                                   | <0.001  | 1.67 (1.63, 1.70)                           | <0.001  |
| Hemoglobin disorder                           | 1.31 (1.09, 1.56)                                   | 0.004   | 1.30 (1.09, 1.56)                           | 0.004   |
| HIV/AIDS                                      | 1.63 (1.40, 1.91)                                   | <0.001  | 1.62 (1.39, 1.90)                           | <0.001  |
| Hypertension                                  | 1.43 (1.39, 1.48)                                   | <0.001  | 1.45 (1.41, 1.50)                           | <0.001  |
| Liver disease                                 | 1.46 (1.30, 1.65)                                   | <0.001  | 1.46 (1.30, 1.65)                           | <0.001  |
| Neurologic disease                            | 2.22 (2.16, 2.28)                                   | <0.001  | 2.19 (2.13, 2.25)                           | <0.001  |
| Obesity                                       | 1.34 (1.30, 1.37)                                   | <0.001  | 1.35 (1.32, 1.38)                           | <0.001  |
| Solid organ transplant                        | 1.50 (1.35, 1.66)                                   | <0.001  | 1.74 (1.57, 1.93)                           | <0.001  |
| Pregnancy                                     | 4.42 (3.97, 4.92)                                   | <0.001  | 4.37 (3.92, 4.86)                           | <0.001  |
| Systemic corticosteroids                      | 1.57 (1.53, 1.61)                                   | <0.001  |                                             |         |
| DMARDs                                        | 1.15 (1.07, 1.24)                                   | <0.001  |                                             |         |

|                               |                   |      |  |  |
|-------------------------------|-------------------|------|--|--|
| TNF-alpha inhibitors          | 0.91 (0.75, 1.10) | 0.33 |  |  |
| IL-6 inhibitors               | 0.90 (0.45, 1.81) | 0.77 |  |  |
| Other biologics               | 0.85 (0.69, 1.05) | 0.13 |  |  |
| Other immunosuppressive drugs | 1.14 (1.00, 1.29) | 0.04 |  |  |

P-values calculated from Cox proportional hazards models. Reference groups for comorbidities and medications are the group of patients without the given disease or without a prescription for the given medication. HR=hazard ratio; CI=confidence interval; HIV=human immunodeficiency virus; AIDS=acquired immunodeficiency syndrome; DMARDs=disease-modifying anti-rheumatic drugs; TNF-alpha=tumor necrosis factor alpha; IL-6=interleukin 6.
