# Supplementary material
Source: PubMed Central journal article supplement (PMC8503974)
Supplement: mmc4.pdf [file mmc4.pdf]

Supplemental Table 7. Unadjusted analyses of associations between demographic and clinical characteristics with COVID-19 in-hospital death

|                               | <b>No COVID-19 In-Hospital Death<br/>N = 5,798,634</b> | <b>COVID-19 In-Hospital Death<br/>N = 7,593</b> | <b>Unadjusted analysis</b>   |                |
|-------------------------------|--------------------------------------------------------|-------------------------------------------------|------------------------------|----------------|
| <b>Variable</b>               | <b>N (%) or Mean (SD)</b>                              | <b>N (%) or Mean (SD)</b>                       | <b>Hazard Ratio (95% CI)</b> | <b>p-value</b> |
| <b>Non-infectious uveitis</b> | 29,794 (0.5)                                           | 75 (1.0)                                        | 1.88 (1.50, 2.37)            | <0.001         |
| <b>Age (years)</b>            | 50.24 (23.5)                                           | 77.63 (9.6)                                     | 1.102 (1.099, 1.104)         | <0.001         |
| <b>Gender</b>                 |                                                        |                                                 |                              |                |
| Female                        | 2,983,317 (51.5)                                       | 3,461 (45.6)                                    | Reference                    |                |
| Male                          | 2,812,274 (48.5)                                       | 4,132 (54.4)                                    | 1.28 (1.22, 1.34)            | <0.001         |
| Unknown                       | 3,043 (0.1)                                            | 0 (0.0)                                         | NA                           | NA             |
| <b>Race/ethnicity</b>         |                                                        |                                                 |                              |                |
| White                         | 3,733,402 (64.4)                                       | 4,294 (56.6)                                    | Reference                    |                |
| Asian                         | 299,840 (5.2)                                          | 221 (2.9)                                       | 0.67 (0.58, 0.76)            | <0.001         |
| Black                         | 585,751 (10.1)                                         | 1,546 (20.4)                                    | 2.31 (2.18, 2.45)            | <0.001         |
| Hispanic                      | 675,019 (11.6)                                         | 1,227 (16.2)                                    | 1.63 (1.53, 1.73)            | <0.001         |
| Other/Unknown                 | 504,622 (8.7)                                          | 305 (4.0)                                       | 0.51 (0.45, 0.57)            | <0.001         |
| <b>Region</b>                 |                                                        |                                                 |                              |                |
| South                         | 2,500,012 (43.1)                                       | 3,494 (46.0)                                    | Reference                    |                |
| Midwest                       | 1,533,347 (26.4)                                       | 1,885 (24.8)                                    | 0.87 (0.83, 0.92)            | <0.001         |
| Northeast                     | 638,640 (11.0)                                         | 1,736 (22.9)                                    | 1.94 (1.83, 2.1)             | <0.001         |
| West                          | <947,686 (<16.4)                                       | >467 (>6.1)                                     | 0.37 (0.33, 0.41)            | <0.001         |
| Other/Unknown                 | >178,949 (>3.1)                                        | <11 (<0.2)                                      | 0.04 (0.02, 0.07)            | <0.001         |
| <b>Homeownership</b>          |                                                        |                                                 |                              |                |
| Probable homeowner            | 3,976,466 (68.6)                                       | 4,895 (64.5)                                    | Reference                    |                |
| Probable renter               | 442,367 (7.6)                                          | 501 (6.6)                                       | 0.96 (0.87, 1.05)            | 0.33           |
| Unknown                       | 1,379,801 (23.8)                                       | 2,197 (28.9)                                    | 1.33 (1.27, 1.40)            | <0.001         |
| <b>Smoking status</b>         |                                                        |                                                 |                              |                |
| Never smoker                  | 849,987 (14.7)                                         | 1,076 (14.2)                                    | Reference                    |                |
| Current/former smoker         | 935,817 (16.1)                                         | 2,660 (35.0)                                    | 2.28 (2.12, 2.45)            | <0.001         |
| Unknown                       | 4,012,830 (69.2)                                       | 3,857 (50.8)                                    | 0.79 (0.74, 0.84)            | <0.001         |
| <b>Asthma</b>                 | 326,945 (5.6)                                          | 675 (8.9)                                       | 1.62 (1.50, 1.76)            | <0.001         |
| <b>Autoimmune disease</b>     | 424,393 (7.3)                                          | 1,361 (17.9)                                    | 2.72 (2.57, 2.88)            | <0.001         |
| <b>Cancer</b>                 | 313,162 (5.4)                                          | 1,155 (15.2)                                    | 3.12 (2.93, 3.32)            | <0.001         |
| <b>Cardiovascular disease</b> | 607,189 (10.5)                                         | 3,816 (50.3)                                    | 8.55 (8.18, 8.95)            | <0.001         |
| <b>Cerebrovascular</b>        | 273,546 (4.7)                                          | 1,660 (21.9)                                    | 5.63 (5.34, 5.95)            | <0.001         |
| <b>Chronic kidney disease</b> | 442,226 (7.6)                                          | 3,185 (42.0)                                    | 8.64 (8.26, 9.05)            | <0.001         |
| <b>Chronic lung disease</b>   | 439,730 (7.6)                                          | 2,342 (30.8)                                    | 5.43 (5.17, 5.70)            | <0.001         |
| <b>Diabetes</b>               | 846,467 (14.6)                                         | 4,093 (53.9)                                    | 6.70 (6.40, 7.01)            | <0.001         |
| <b>Hemoglobin disorder</b>    | 8,577 (0.2)                                            | 20 (0.3)                                        | 1.76 (1.14, 2.73)            | 0.01           |
| <b>HIV/AIDS</b>               | 11,993 (0.2)                                           | 30 (0.4)                                        | 1.94 (1.35, 2.77)            | <0.001         |
| <b>Hypertension</b>           | 2,010,282 (34.7)                                       | 6,639 (87.4)                                    | 12.66 (11.83, 13.55)         | <0.001         |
| <b>Liver disease</b>          | 11,059 (0.2)                                           | 73 (1.0)                                        | 5.50 (4.37, 6.93)            | <0.001         |

|                                      |                |              |                      |        |
|--------------------------------------|----------------|--------------|----------------------|--------|
| <b>Neurologic disease</b>            | 229,803 (4.0)  | 2,370 (31.2) | 11.52 (10.98, 12.10) | <0.001 |
| <b>Obesity</b>                       | 627,258 (10.8) | 1,622 (21.4) | 2.21 (2.10, 2.33)    | <0.001 |
| <b>Solid organ transplant</b>        | 16,033 (0.3)   | 75 (1.0)     | 3.57 (2.85, 4.48)    | <0.001 |
| <b>Pregnancy</b>                     | 62,293 (1.1)   | 16 (0.2)     | 0.19 (0.12, 0.32)    | <0.001 |
| <b>Systemic corticosteroids</b>      | 647,511 (11.2) | 1,983 (26.1) | 2.65 (2.52, 2.79)    | <0.001 |
| <b>DMARDs</b>                        | 52,571 (0.9)   | 179 (2.4)    | 2.52 (2.17, 2.92)    | <0.001 |
| <b>TNF-alpha inhibitors</b>          | 16,684 (0.3)   | 16 (0.2)     | 0.71 (0.44, 1.17)    | 0.18   |
| <b>IL-6 inhibitors</b>               | >749 (>0.01)   | <11 (<0.15)  | 1.91 (0.48, 7.65)    | 0.36   |
| <b>Other biologics</b>               | 13,744 (0.2)   | 13 (0.2)     | 0.70 (0.41, 1.20)    | 0.20   |
| <b>Other immunosuppressive drugs</b> | 20,753 (0.4)   | 47 (0.6)     | 1.66 (1.25, 2.21)    | <0.001 |

P-values calculated from Cox proportional hazards models. Reference groups for comorbidities and medications are the group of patients without the given disease or without a prescription for the given medication. SD=standard deviation; CI=confidence interval; HIV=human immunodeficiency virus; AIDS=acquired immunodeficiency syndrome; DMARDs=disease-modifying anti-rheumatic drugs; TNF-alpha=tumor necrosis factor alpha; IL-6=interleukin 6.
