# Supplementary material
Source: PubMed Central journal article supplement (PMC8503974)
Supplement: mmc5.pdf [file mmc5.pdf]

Supplemental Table 8. Fully adjusted and reduced (no immunosuppressives) model results showing associations between demographic and clinical characteristics with COVID-19 in-hospital death

| Variable                                | Fully Adjusted Model<br>Immunosuppressives included |         | Reduced Model<br>Immunosuppressives removed |         |
|-----------------------------------------|-----------------------------------------------------|---------|---------------------------------------------|---------|
|                                         | Adjusted HR (95% CI)                                | p-value | Adjusted HR (95% CI)                        | p-value |
| Non-infectious uveitis                  | 0.90 (0.72, 1.13)                                   | 0.37    | 0.91 (0.73, 1.14)                           | 0.42    |
| Age (years)                             | 1.072 (1.069, 1.074)                                | <0.001  | 1.071 (1.068, 1.073)                        | <0.001  |
| Male vs. Female                         | 1.64 (1.57, 1.72)                                   | <0.001  | 1.61 (1.54, 1.69)                           | <0.001  |
| Asian vs. White                         | 1.12 (0.97, 1.28)                                   | 0.11    | 1.09 (0.95, 1.25)                           | 0.22    |
| Black vs. White                         | 1.75 (1.65, 1.86)                                   | <0.001  | 1.73 (1.63, 1.84)                           | <0.001  |
| Hispanic vs. White                      | 1.82 (1.71, 1.94)                                   | <0.001  | 1.79 (1.68, 1.92)                           | <0.001  |
| Other/Unknown vs. White                 | 0.80 (0.71, 0.90)                                   | <0.001  | 0.80 (0.71, 0.90)                           | <0.001  |
| Midwest vs. South                       | 1.25 (1.18, 1.32)                                   | <0.001  | 1.23 (1.16, 1.31)                           | <0.001  |
| Northeast vs. South                     | 1.80 (1.70, 1.91)                                   | <0.001  | 1.75 (1.65, 1.86)                           | <0.001  |
| West vs. South                          | 0.73 (0.66, 0.81)                                   | <0.001  | 0.71 (0.64, 0.78)                           | <0.001  |
| Other/Unknown vs. South                 | 0.18 (0.09, 0.36)                                   | <0.001  | 0.17 (0.08, 0.34)                           | <0.001  |
| Probable renter vs. Probable homeowner  | 1.37 (1.25, 1.51)                                   | <0.001  | 1.37 (1.25, 1.51)                           | <0.001  |
| Unknown vs. Probable homeowner          | 1.80 (1.71, 1.90)                                   | <0.001  | 1.80 (1.71, 1.90)                           | <0.001  |
| Current/former smoker vs. Never smoker  | 1.30 (1.21, 1.40)                                   | <0.001  | 1.33 (1.23, 1.43)                           | <0.001  |
| Unknown smoking status vs. Never smoker | 1.25 (1.17, 1.34)                                   | <0.001  | 1.23 (1.15, 1.32)                           | <0.001  |
| Asthma                                  | 1.01 (0.93, 1.10)                                   | 0.74    | 1.09 (1.00, 1.18)                           | 0.05    |
| Autoimmune disease                      | 1.11 (1.04, 1.18)                                   | 0.002   | 1.20 (1.13, 1.27)                           | <0.001  |
| Cancer                                  | 1.07 (1.00, 1.14)                                   | 0.05    | 1.08 (1.02, 1.15)                           | 0.02    |
| Cardiovascular disease                  | 1.53 (1.46, 1.61)                                   | <0.001  | 1.55 (1.47, 1.63)                           | <0.001  |
| Cerebrovascular                         | 1.04 (0.98, 1.10)                                   | 0.22    | 1.04 (0.98, 1.10)                           | 0.24    |
| Chronic kidney disease                  | 1.58 (1.51, 1.67)                                   | <0.001  | 1.59 (1.51, 1.67)                           | <0.001  |
| Chronic lung disease                    | 1.40 (1.32, 1.47)                                   | <0.001  | 1.49 (1.42, 1.58)                           | <0.001  |
| Diabetes                                | 1.80 (1.71, 1.89)                                   | <0.001  | 1.78 (1.69, 1.87)                           | <0.001  |
| Hemoglobin disorder                     | 1.02 (0.66, 1.58)                                   | 0.93    | 1.02 (0.66, 1.59)                           | 0.92    |
| HIV/AIDS                                | 1.65 (1.15, 2.36)                                   | 0.007   | 1.64 (1.15, 2.35)                           | 0.007   |
| Hypertension                            | 1.48 (1.37, 1.59)                                   | <0.001  | 1.50 (1.39, 1.62)                           | <0.001  |
| Liver disease                           | 1.81 (1.44, 2.28)                                   | <0.001  | 1.80 (1.43, 2.27)                           | <0.001  |
| Neurologic disease                      | 2.71 (2.57, 2.86)                                   | <0.001  | 2.67 (2.53, 2.81)                           | <0.001  |
| Obesity                                 | 1.27 (1.20, 1.35)                                   | <0.001  | 1.29 (1.22, 1.36)                           | <0.001  |
| Solid organ transplant                  | 1.33 (1.05, 1.69)                                   | 0.02    | 1.56 (1.24, 1.96)                           | <0.001  |
| Pregnancy                               | 2.16 (1.32, 3.53)                                   | 0.002   | 2.18 (1.33, 3.57)                           | 0.002   |

|                               |                   |        |  |  |
|-------------------------------|-------------------|--------|--|--|
| Systemic corticosteroids      | 1.76 (1.67, 1.86) | <0.001 |  |  |
| DMARDs                        | 1.13 (0.96, 1.33) | 0.14   |  |  |
| TNF-alpha inhibitors          | 0.79 (0.48, 1.30) | 0.35   |  |  |
| IL-6 inhibitors               | 1.24 (0.31, 4.98) | 0.76   |  |  |
| Other biologics               | 0.73 (0.42, 1.26) | 0.25   |  |  |
| Other immunosuppressive drugs | 1.18 (0.88, 1.58) | 0.26   |  |  |

P-values calculated from Cox proportional hazards models. Reference groups for comorbidities and medications are the group of patients without the given disease or without a prescription for the given medication. HR=hazard ratio; CI=confidence interval; HIV=human immunodeficiency virus; AIDS=acquired immunodeficiency syndrome; DMARDs=disease-modifying anti-rheumatic drugs; TNF-alpha=tumor necrosis factor alpha; IL-6=interleukin 6.
