# Supplementary material
Source: PubMed Central journal article supplement (PMC8503974)
Supplement: mmc6.pdf [file mmc6.pdf]

Supplemental Table 9. Fully adjusted model results by age subgroups showing associations between non-infectious uveitis (NIU) and COVID-19 infection, hospitalization, and in-hospital death

| COVID-19 outcome results for NIU vs. non-NIU | Age Subgroup      |                   |
|----------------------------------------------|-------------------|-------------------|
|                                              | Age < 50 years    | Age ≥ 50 years    |
| <b>Infection</b>                             |                   |                   |
| N (%) of NIU with infection                  | 316 (5.8%)        | 1,392 (5.7%)      |
| N (%) of non-NIU with infection              | 105,721 (4.0%)    | 152,667 (4.9%)    |
| Adjusted HR (95% CI)                         | 1.15 (1.03, 1.28) | 1.05 (1.00, 1.11) |
| P-value                                      | 0.01              | 0.07              |
| <b>Hospitalization</b>                       |                   |                   |
| N (%) of NIU with hosp.                      | 12 (0.2%)         | 351 (1.4%)        |
| N (%) of non-NIU with hosp.                  | 2,633 (0.1%)      | 33,325 (1.1%)     |
| Adjusted HR (95% CI)                         | 0.95 (0.54, 1.68) | 0.98 (0.88, 1.09) |
| P-value                                      | 0.86              | 0.73              |
| <b>In-hospital death</b>                     |                   |                   |
| N (%) of NIU with in-hosp. death             | 0 (0.0%)          | 75 (0.3%)         |
| N (%) of non-NIU with in-hosp. death         | 111 (0.004%)      | 7,407 (0.2%)      |
| Adjusted HR (95% CI)                         | Non-estimable     | 0.91 (0.72, 1.14) |
| P-value                                      | Non-estimable     | 0.41              |

P-values calculated from Cox proportional hazards models including adjustment for demographic covariates, comorbidities, and immunosuppressive drugs. NIU=non-infectious uveitis; HR=hazard ratio; CI=confidence interval. Reference group for non-infectious uveitis is patients without non-infectious uveitis. The adjusted hazard ratio and corresponding p-value for COVID-19 death could not be calculated for the NIU vs. non-NIU comparison in the age < 50 group because no events occurred in the NIU group.
